# Supplementary material for: Mechanical force regulates ligand binding and function of PD-1
Source: PubMed Central journal article supplement (PMC11437077; doi:10.1038/s41467-024-52565-2), 2024-09-27
Supplement: 41467_2024_52565_MOESM1_ESM.pdf [file 41467_2024_52565_MOESM1_ESM.pdf]

## Supplementary Figures for

### Mechanical force regulates ligand binding and function of PD-1

Kaitao Li<sup>1,2†</sup>, Paul Cardenas-Lizana<sup>1,2‡</sup>, Jintian Lyu<sup>1,2||</sup>, Anna V. Kellner<sup>1&</sup>, Menglan Li<sup>1,2</sup>, Peiwen Cong<sup>1,2</sup>, Valencia E. Watson<sup>1,2</sup>, Zhou Yuan<sup>1-3§</sup>, Eunseon Ahn<sup>4,5¶</sup>, Larissa Doudy<sup>1,2</sup>, Zhenhai Li<sup>1,3#</sup>, Khalid Salaita<sup>1,6</sup>, Rafi Ahmed<sup>4,5</sup>, Cheng Zhu<sup>1-3\*</sup>

<sup>1</sup>Wallace H. Coulter Department of Biomedical Engineering, <sup>2</sup>Parker H. Petit Institute for Bioengineering and Biosciences, <sup>3</sup>George W. Woodruff School of Mechanical Engineering, Georgia Institute of Technology, Atlanta, Georgia 30332, USA

<sup>4</sup>Emory Vaccine Center, <sup>5</sup>Department of Microbiology and Immunology, Emory University School of Medicine, <sup>6</sup>Department of Chemistry, Emory University, Atlanta, GA 30322, USA

\*Corresponding author, **Email:** [cheng.zhu@bme.gatech.edu](mailto:cheng.zhu@bme.gatech.edu)

†Present address: Shennon Biotechnologies, San Francisco, CA, USA

‡Present address: Department of Bioengineering and Chemical Engineering, University of Engineering and Technology - UTEC, Lima, Peru

||Present address: L.E.K. consulting, Boston, MA, USA

&Present address: Elephas, Madison, WI, USA

§Present address: Alfred E. Mann Department of Biomedical Engineering, University of Southern California, Los Angeles, CA, USA

¶Present address: Merck, South San Francisco, CA, USA

#Present address: School of Mechanics and Engineering Science, Shanghai University, Shanghai, China

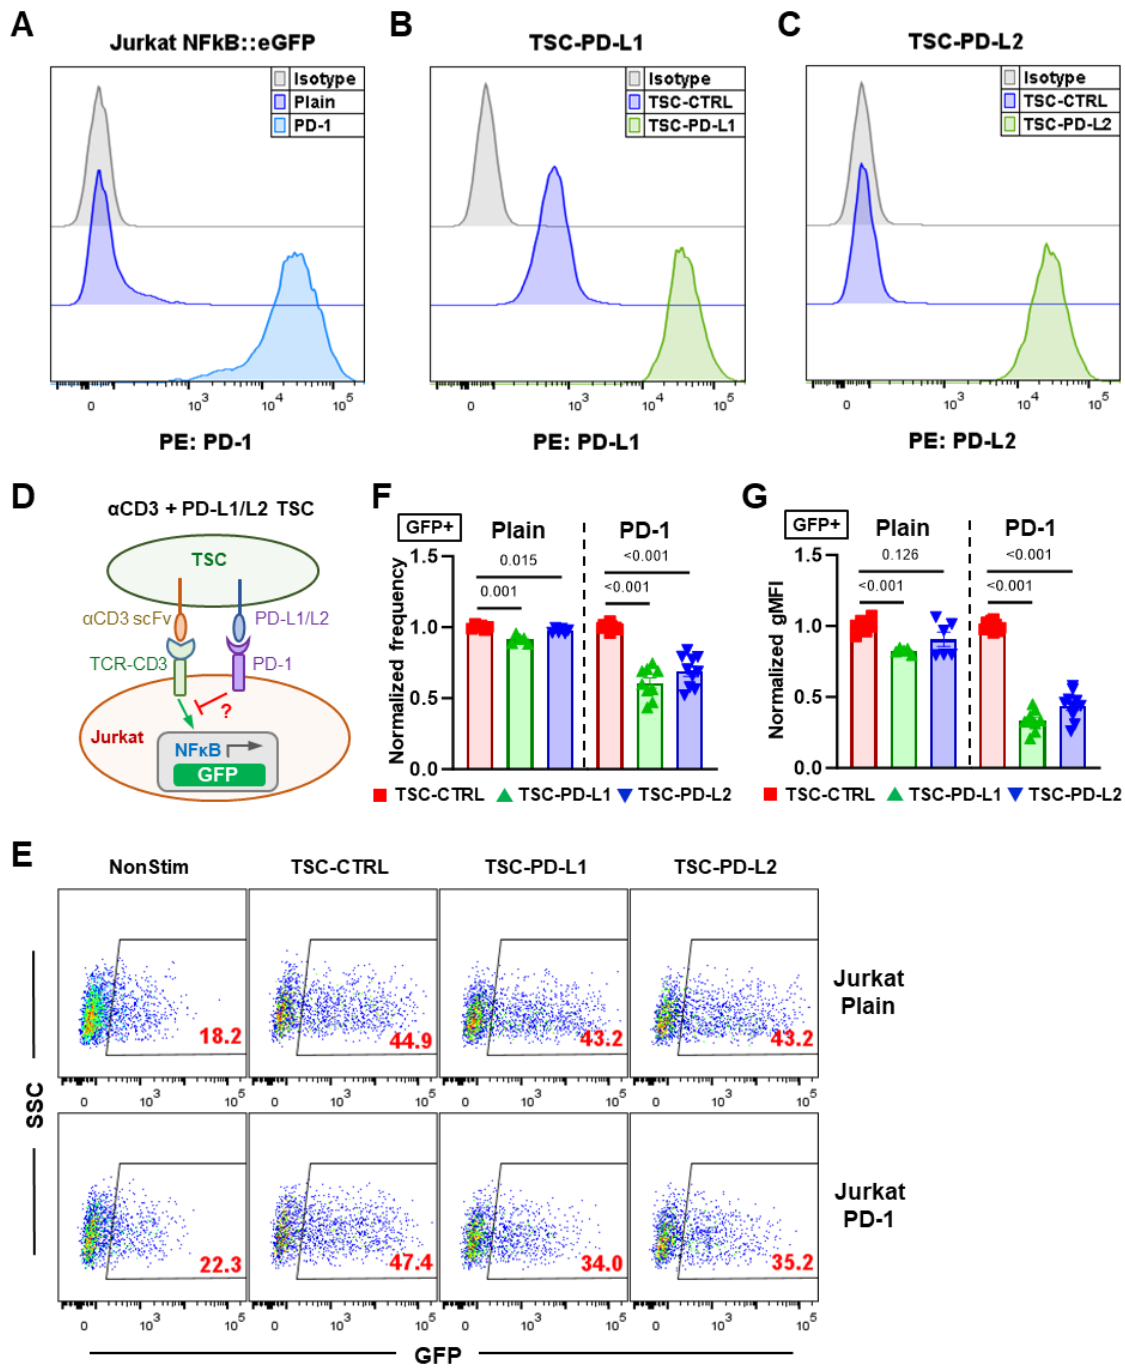

**Fig. S1.** Detection of PD-1 mediated suppression of TCR-CD3 signaling using NFkB::eGFP reporter Jurkat cells. (A) Flow cytometry histograms of PD-1 staining of plain or PD-1 transduced NFkB::eGFP reporter Jurkat cells. (B-C) Flow cytometry histograms of PD-L1 (B) or PD-L2 (C) staining of TSC without transducing PD-1 ligands (TSC-CTRL) or transduced with PD-L1 (TSC-

PD-L1) or PD-L2 (TSC-PD-L2). (D) Schematics of stimulating NF $\kappa$ B::eGFP reporter Jurkat cells with T-cell stimulator cells (TSC) expressing a single-chain fragment variable (scFv) of anti-CD3 (clone OKT3) and PD-L1 or PD-L2. (E) Representative SSC vs GFP plots of reporter Jurkat cells 24 hr after stimulation with indicated conditions. (F-G) Quantification of GFP expression for conditions in B. n = 5 - 6 for plain pooled from 3 independent experiments or n = 9 - 10 for PD-1 reporter cells pooled from 5 independent experiments. Normalized frequency (F) and normalized geometric mean fluorescence intensity (gMFI) (G) were calculated as (sample – averaged background)/(TSC control – averaged background) and presented as mean +/- SEM. Numbers on graphs represent p values calculated from two-tailed student t-test. Source data are provided in Source Data file.

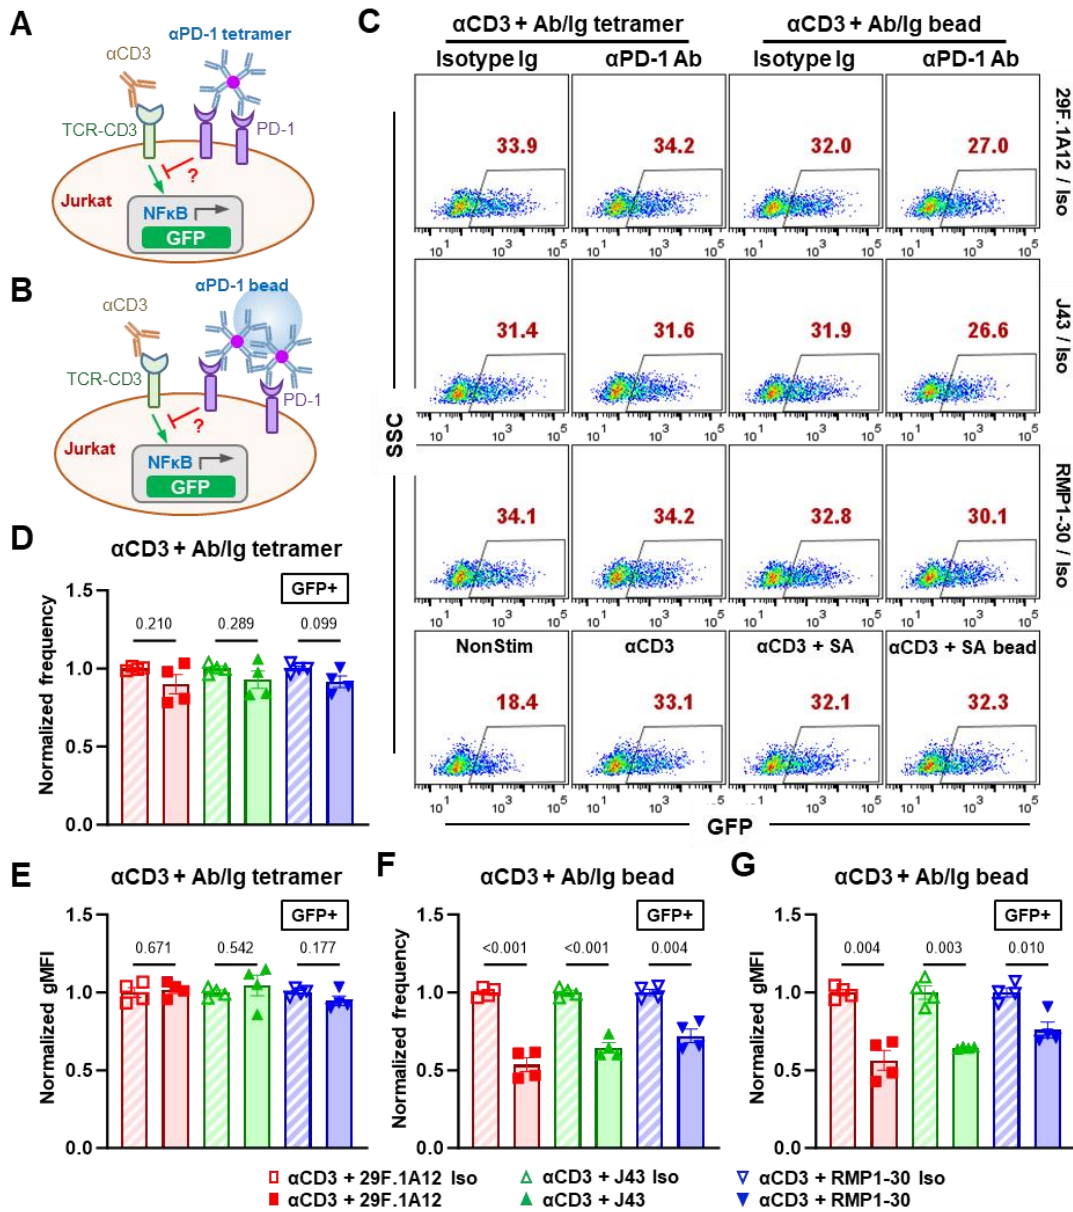

**Fig. S2.** Immobilized anti-PD-1 antibody triggers PD-1 function. (A&B) Schematics of stimulating NF $\kappa$ B::eGFP reporter Jurkat cells with soluble anti-CD3 and soluble (A) or bead-coated (B) anti-PD-1 antibody (or isotype Ig). (C) Representative SSC vs GFP plots of reporter Jurkat cells 24 hr after stimulation with indicated conditions. (D-G) Quantification of GFP expression for conditions in A.  $n = 4$  for all conditions pooled from two independent experiments. Normalized frequency (D&F) and normalized gMFI (E&G) were calculated as (sample – averaged background)/(isotype control

– averaged background) and presented as mean +/- SEM. Numbers on graphs represent p values calculated from two-tailed student t-test. Source data are provided in Source Data file.

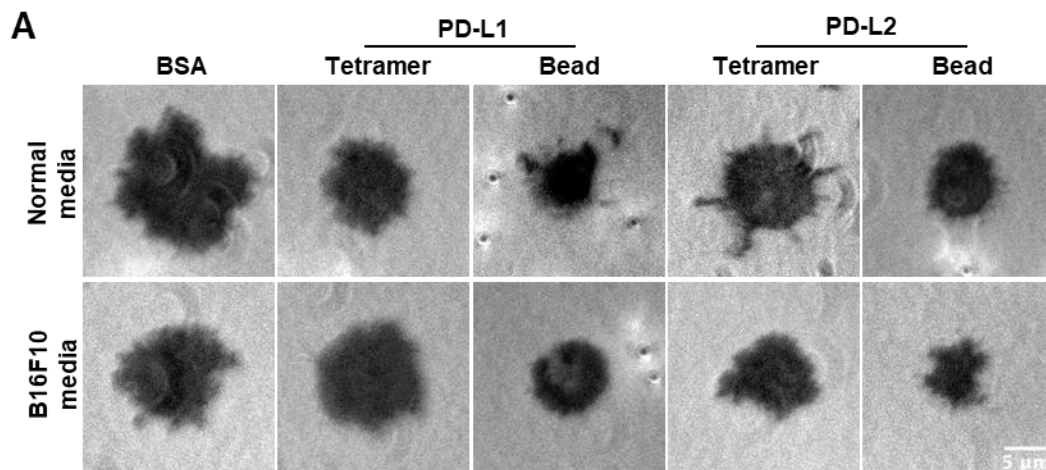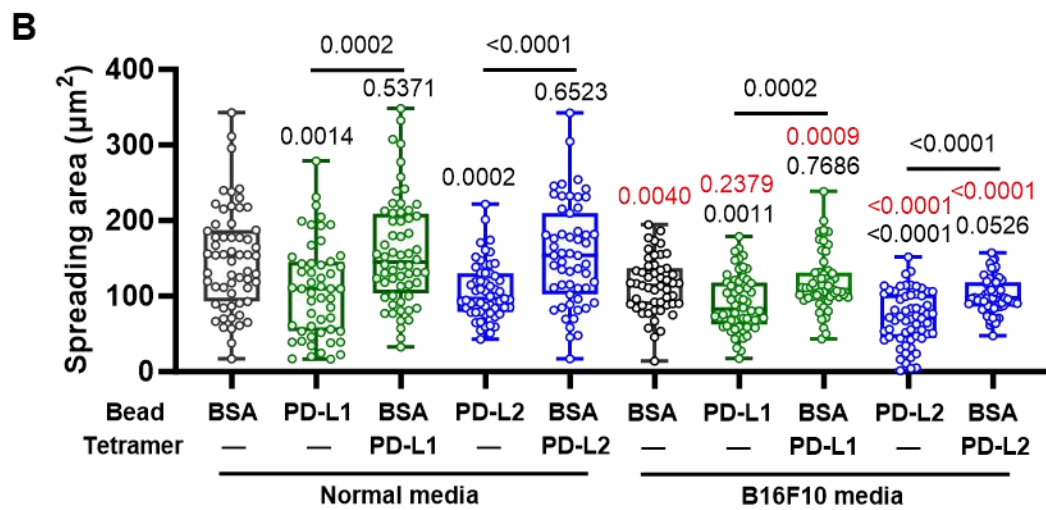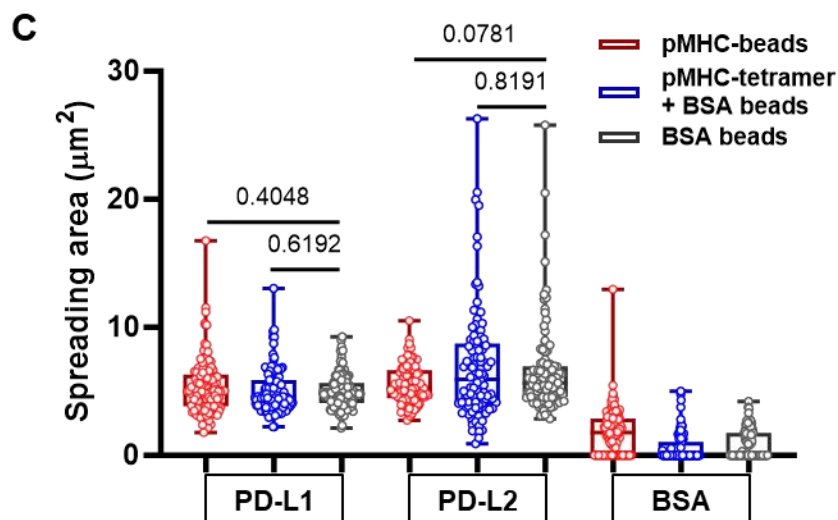

**Fig. S3.** Respective effects of tumor cell media and TCR stimulation on T cell spreading on pMHC and on PD-Ligands, respectively. Representative RICM images (A) and quantification (B) of activated CD8<sup>+</sup> OT1 T cells spreading on SIINFEKL:H2-K<sup>b</sup> coated surface in contact with beads coated with PD-L1, PD-L2, or BSA in the presence of tetrameric PD-L1, PD-L2, or BSA in solution. The experiment was done in either normal media (*upper row*, pH = 7.76) or B16F10 melanoma cell-conditioned media (*lower row*, pH = 7.02). n = 59, 52, 60, 57, 55, 51, 60, 57, 60, and 59 cells. Black numbers on graphs represent p values calculated from two-tailed Mann-Whitney U test of indicated two groups or PD-Ligand groups (green or blue) with BSA control (black). Red numbers on graphs represent p values calculated from two-tailed Mann-Whitney U test of normal media vs B16F10 media for each group. (C) Engagement of TCR with bead-bound or tetrameric pMHC in solution had no effect on T cell spreading on PD-L1/L2-coated surface. Activated OT1 T cells spreading on PD-L1, PD-L2, or BSA surface in contact with SIINFEKL:H2-K<sup>b</sup> or BSA coated beads in the absence of presence of tetrameric SIINFEKL:H2-K<sup>b</sup> in solution. n = 119, 115, 121, 109, 105, 111, 110, 102, and 106 cells from 1 of 2 independent experiments. Data were presented in box (median with 25%/75% boundaries) and whisker (min and max) plots. Numbers on graphs represent p values calculated from two-tailed Mann-Whitney U test of indicated two groups or the experiment group (green or blue) with BSA control (black). Source data are provided in Source Data file.

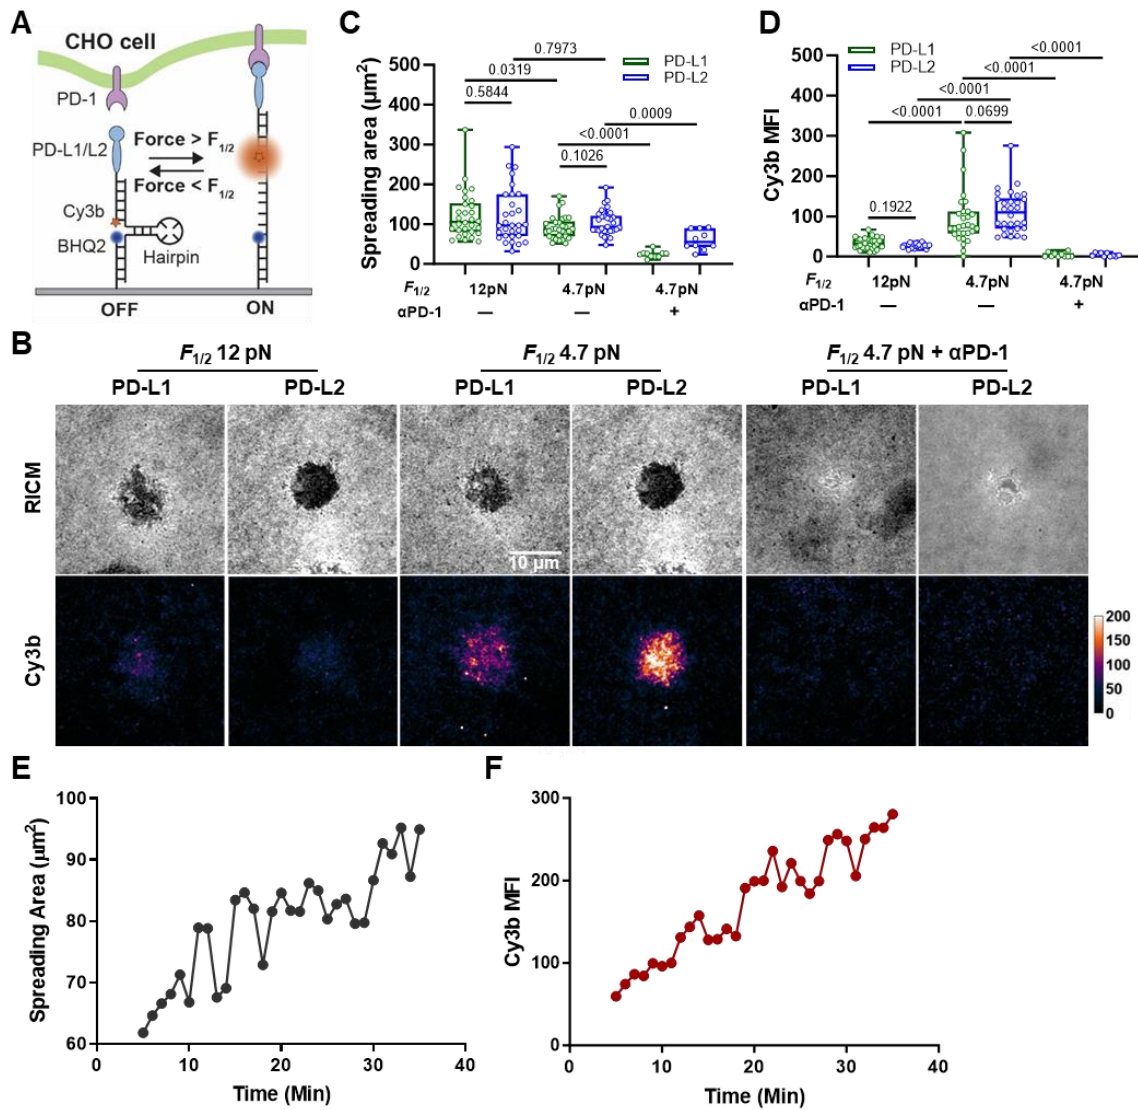

**Fig. S4.** DNA-based MTPs reveal active cellular forces applied to PD-1–PD-Ligand bonds. (A) Schematics of detecting cellular forces on PD-1–PD-Ligand bonds using DNA-based molecular tension probes (MTPs). Forces above threshold unfold the hairpin, which separates Cy3B from the BHQ2 to de-quench the fluorophore. (B) Representative reflection interference contrast microscopy (RISM) and total internal reflection fluorescence (TIRF) images of PD-1 expressing CHO cells 30 min after landing on glass surface functionalized with MTPs of indicated conditions. For PD-1 blockade, cells were pre-incubated with PD-1 blocking antibody clone 29F.1A12 before imaging. (C-D) Quantification of cell spreading area (C) and tension signal (D) for conditions in B.  $n = 30$ ,



30, 30, 30, 10, and 10 pooled from 3 independent experiments. Data were presented in box (median with 25%/75% boundaries) and whisker (min and max) plots. Numbers on graphs represent p values calculated from two-tailed Mann-Whitney U test. (E&F) Realtime quantification of spreading area (E) and Cy3b fluorescence (F) of a PD-1 CHO cell spreading on PD-L2-coupled MTP of 4.7 pN threshold force as shown in Video S2. Source data are provided in Source Data file.

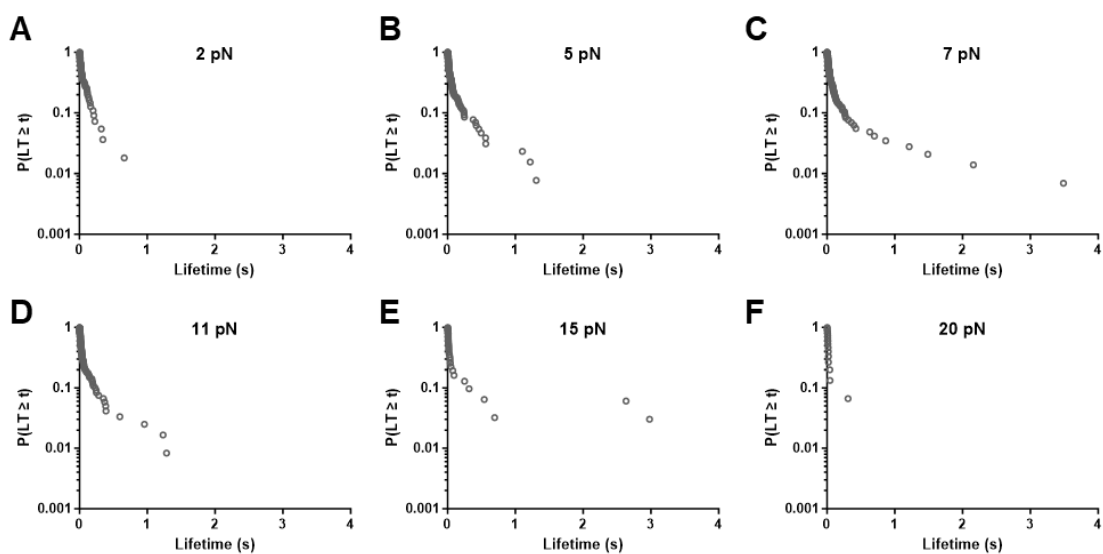

**Fig. S5.** Survival frequencies (fraction of event with lifetime greater than  $t$ ) of PD-1–PD-L1 bond lifetime for different force bins.  $n = 55, 129, 144, 120, 33,$  and  $16$  lifetime events for (A) to (F) respectively. Source data are provided in Source Data file.

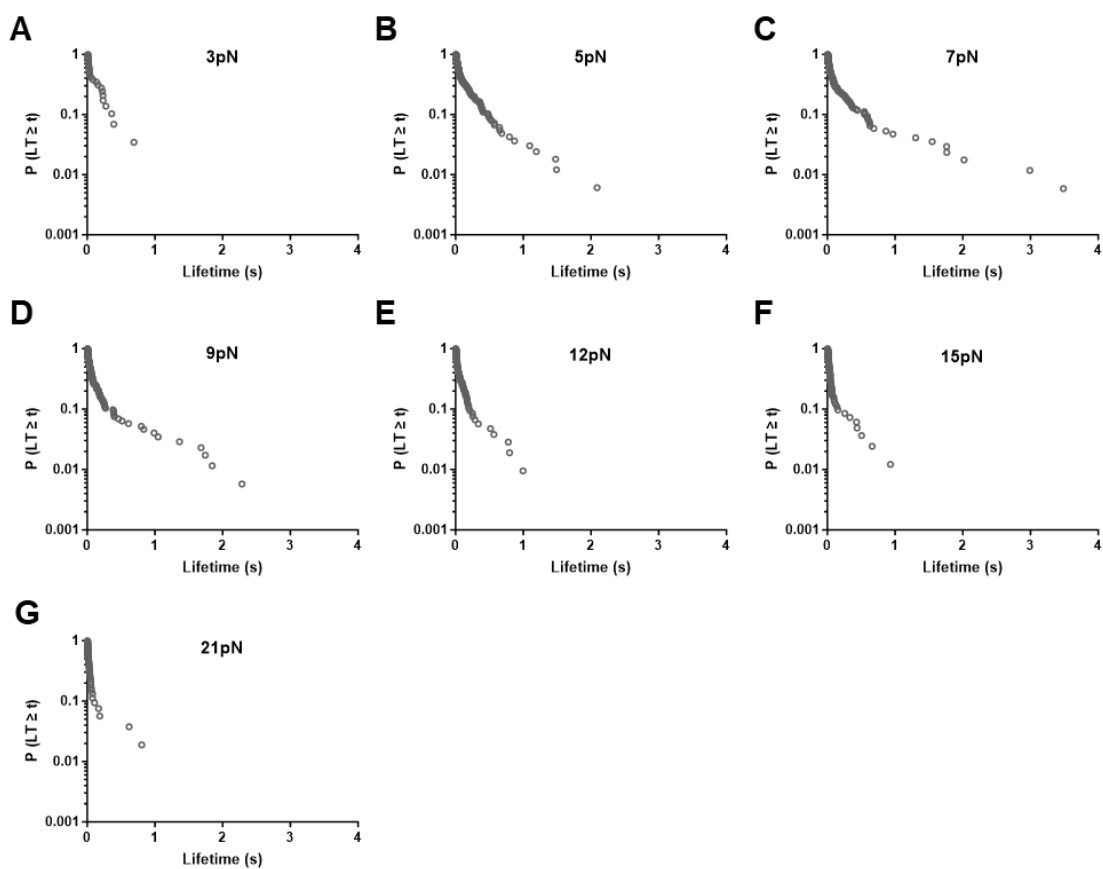

**Fig. S6.** Survival frequencies (fraction of event with lifetime greater than  $t$ ) of PD-1-PD-L2 bond lifetime for different force bins.  $n = 29, 165, 170, 173, 105, 82,$  and  $53$  lifetime events for (A) to (G) respectively. Source data are provided in Source Data file.

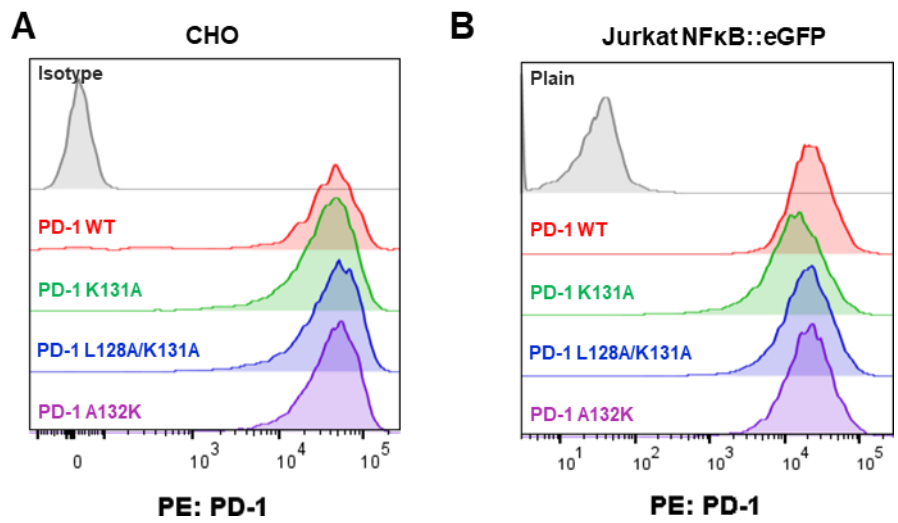

**Fig. S7.** Flow cytometry histograms comparing PD-1 staining of CHO cells (A) or NFkB::eGFP reporter Jurkat cells (B) expressing WT or indicated mutants of PD-1.

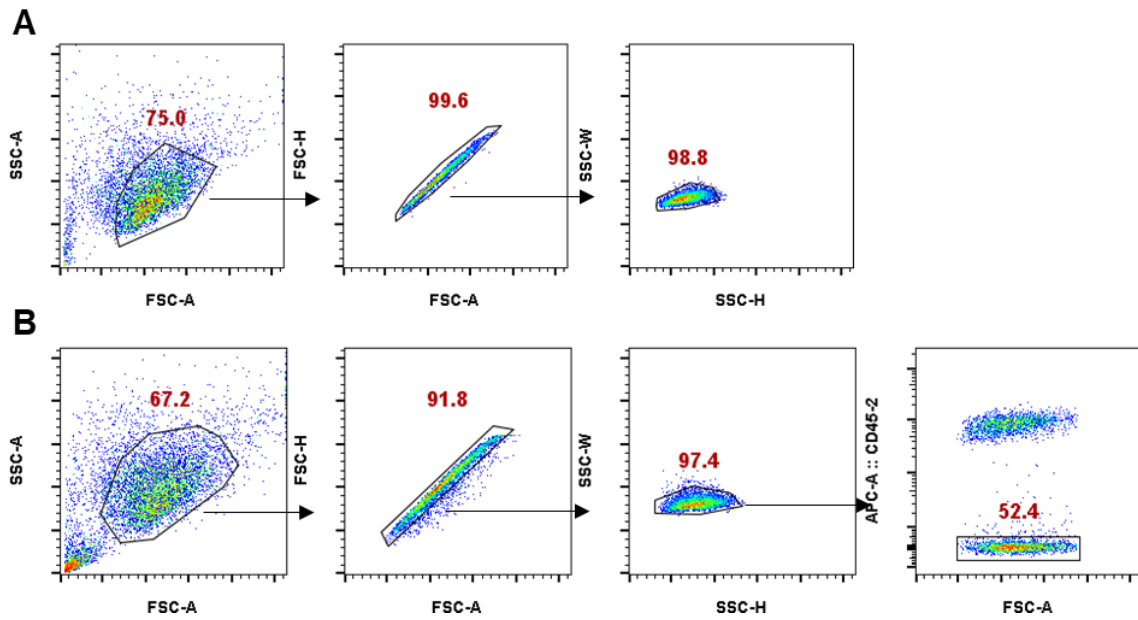

**Fig. S8.** Gating strategies for flow cytometry data. (A) Sequential gating for data with one cell population to quantify GFP induction, or expression of surface PD-1, PD-L1, or PD-L2 (related to Figs. 1, S1A-C, S2, and S7). (B) Sequential gating or reporter Jurkat cells co-cultured with CD45.2+ TSC cells (related to Figs. 7, and S1E-G).
